# Supplementary material for: Isolation and Characterization of Lytic Pseudomonas aeruginosa Bacteriophages Isolated from Sewage Samples from Tunisia
Source: MDPI journal article supplement (doi:10.3390/v14112339), 2022-10-25
Supplement: s1 [file s1]

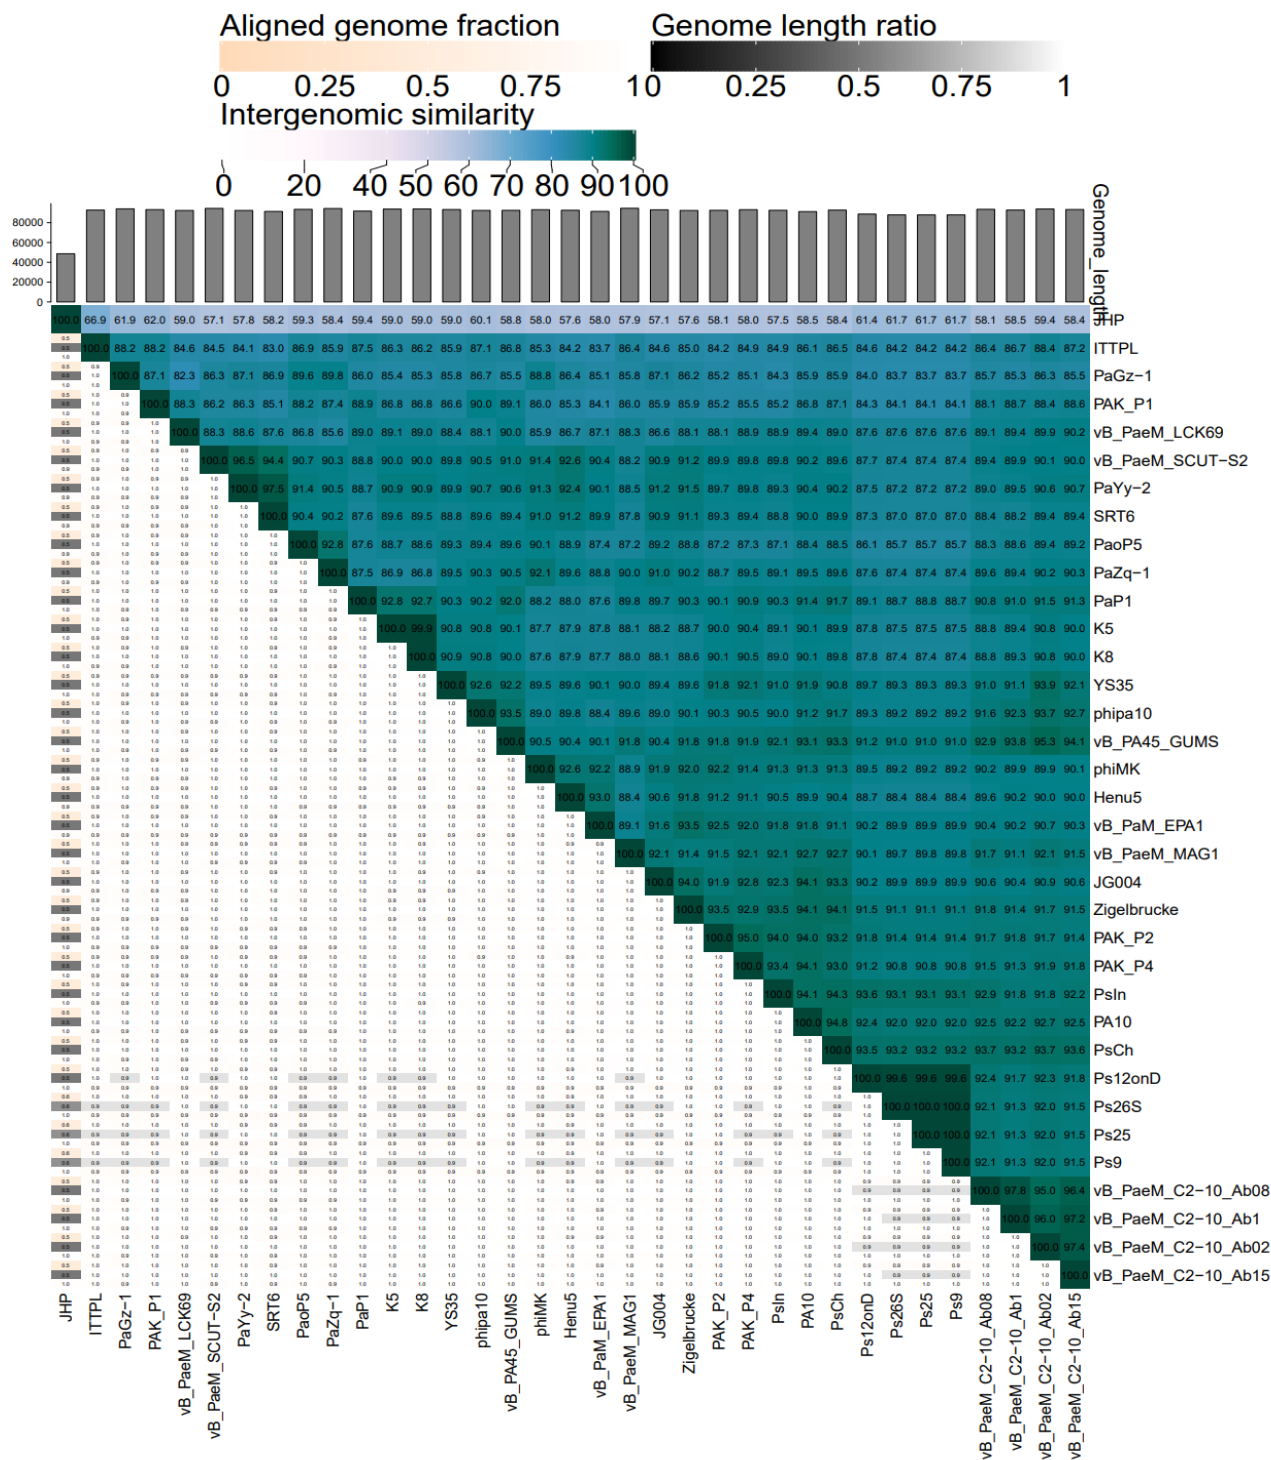

Supplement Figure S1: VIDIRIC-calculated percentage sequence similarity between phages. The phage names are indicated by the horizontal and vertical coordinates.

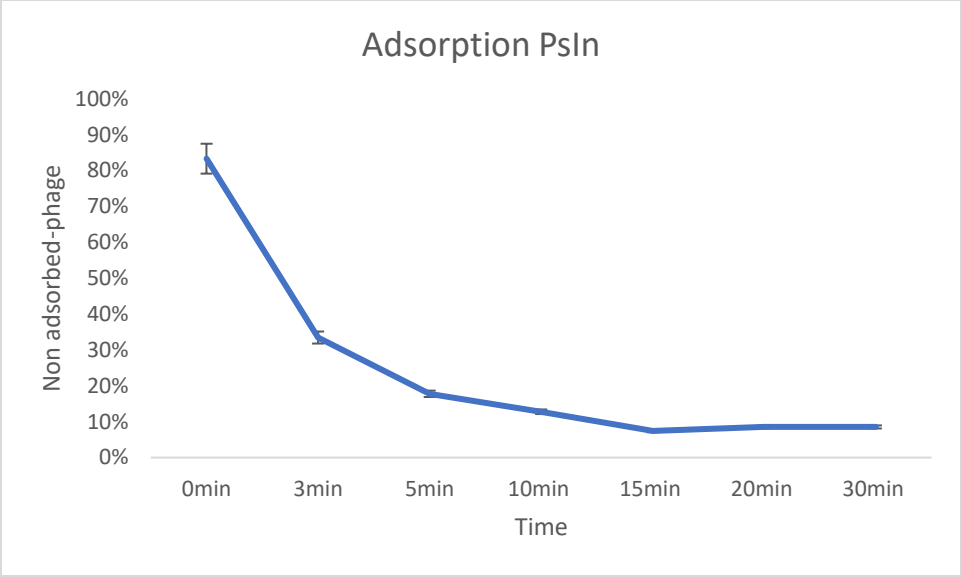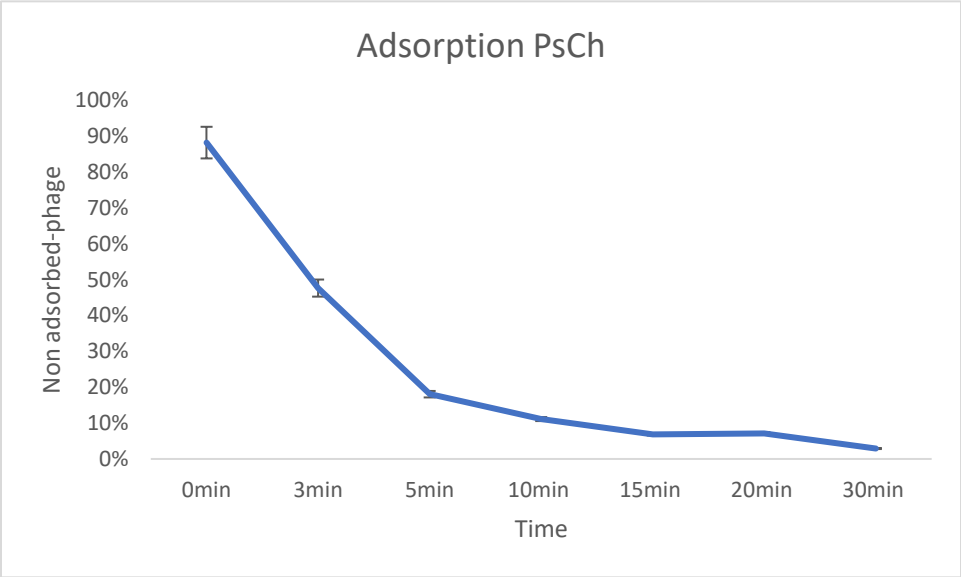

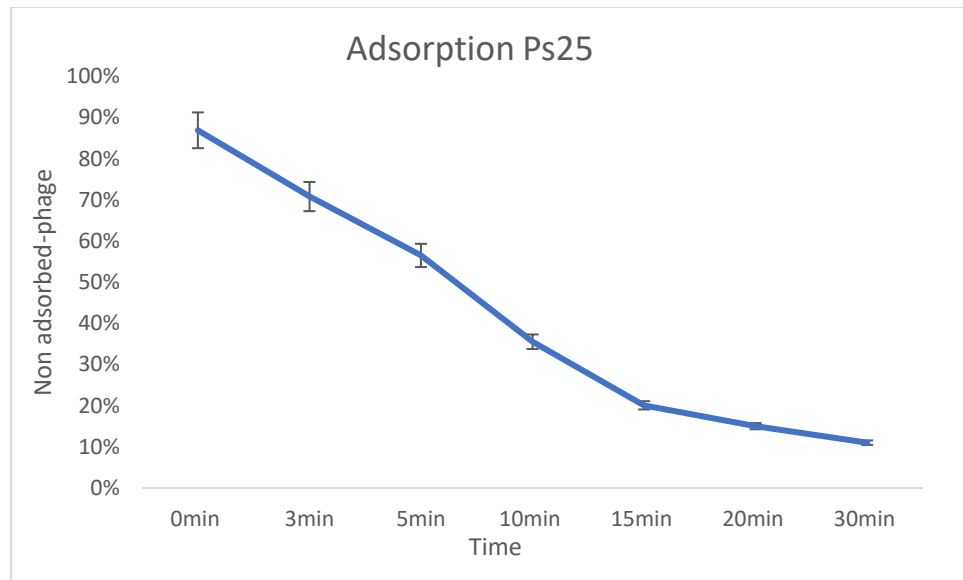

Supplement Figure S2: The adsorption curve of phages PsIn, PsCh and Ps25 on *P. aeruginosa* strain CN 573.
